# Supplementary figures and images for: Structural mechanism of strand exchange by the RAD51 filament
Source: eLife journal article supplement (doi:10.7554/elife.107114), 2025-05-27

|                     | 12 | 13 | 14 | 15 | 16 | 17 | 18 |
|---------------------|----|----|----|----|----|----|----|
| ssDNA (0.5 $\mu$ M) | +  | +  | +  | -  | -  | -  | +  |
| dsDNA (0.5 $\mu$ M) | -  | -  | -  | +  | +  | +  | +  |
| mSA (5 $\mu$ M)     | -  | +  | +  | -  | +  | +  | +  |
| RAD51 (10 $\mu$ M)  | -  | -  | +  | -  | -  | +  | +  |

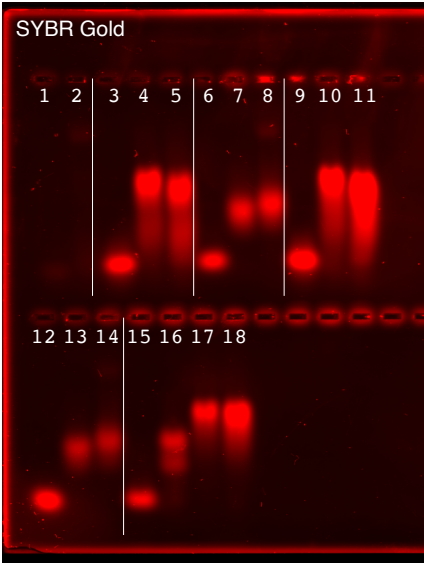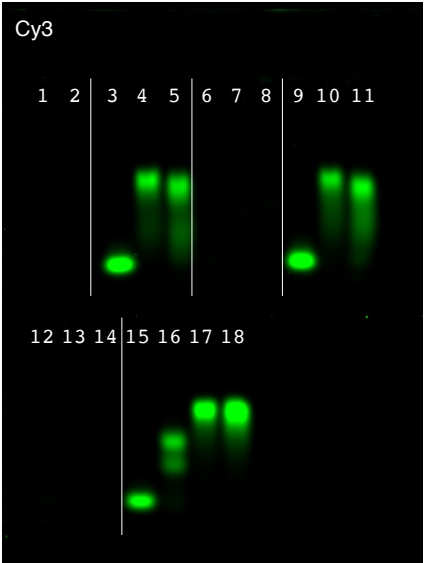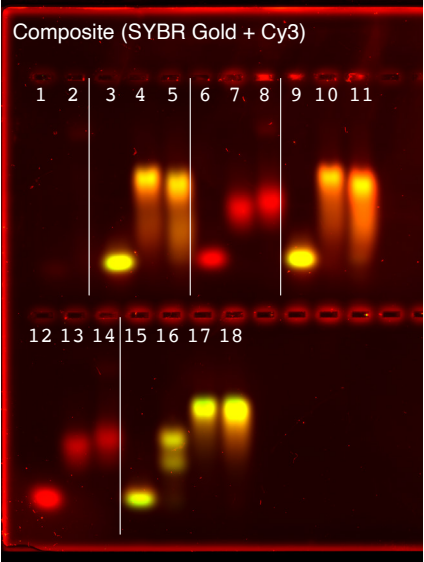

Supplement: fig1-figsupp1-data2 [file elife-107114-fig1-figsupp1-data2-v1.zip]

|                     |   |   |     |   |    |    |    |   |   |     |   |    |    |    |
|---------------------|---|---|-----|---|----|----|----|---|---|-----|---|----|----|----|
| ssDNA (0.5 $\mu$ M) | + | + | +   | + | +  | +  | +  | + | + | +   | + | +  | +  | +  |
| dsDNA (0.5 $\mu$ M) | - | - | -   | - | -  | -  | -  | + | + | +   | + | +  | +  | +  |
| RAD51 ( $\mu$ M)    | 0 | 1 | 2.5 | 5 | 10 | 20 | 30 | 0 | 1 | 2.5 | 5 | 10 | 20 | 30 |

Cy3

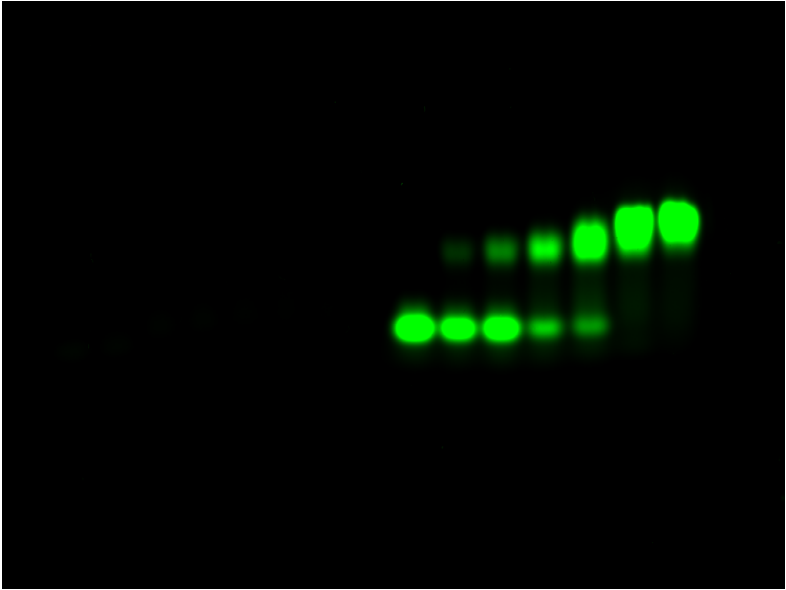

Cy5

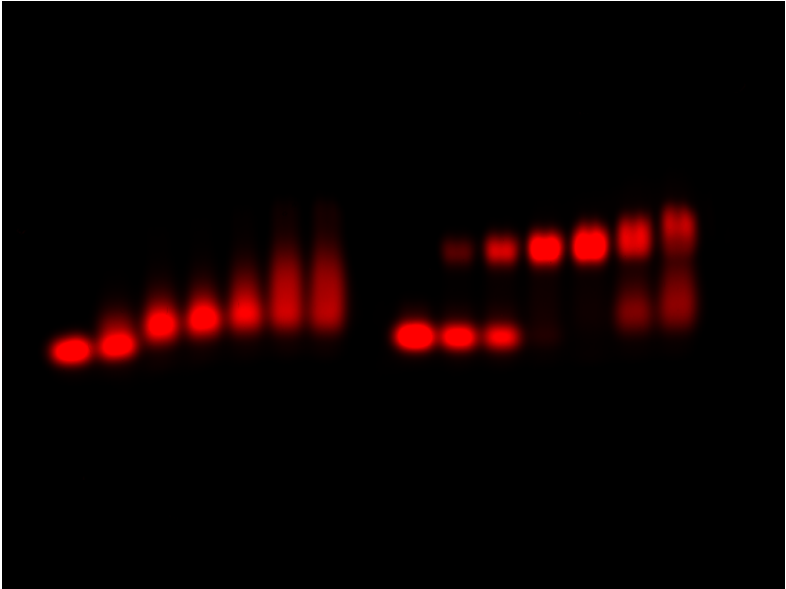

Merge

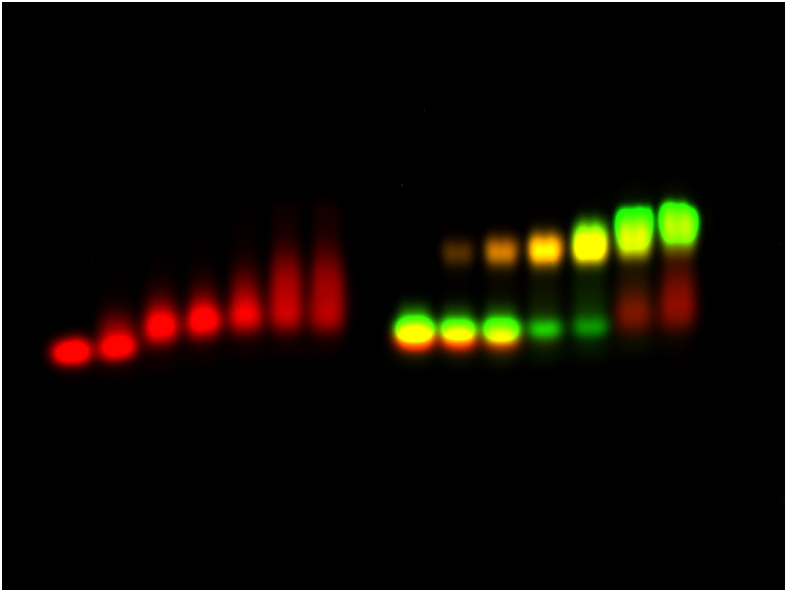

Supplement: fig1-figsupp1-data2 [file elife-107114-fig1-figsupp1-data2-v1.zip]

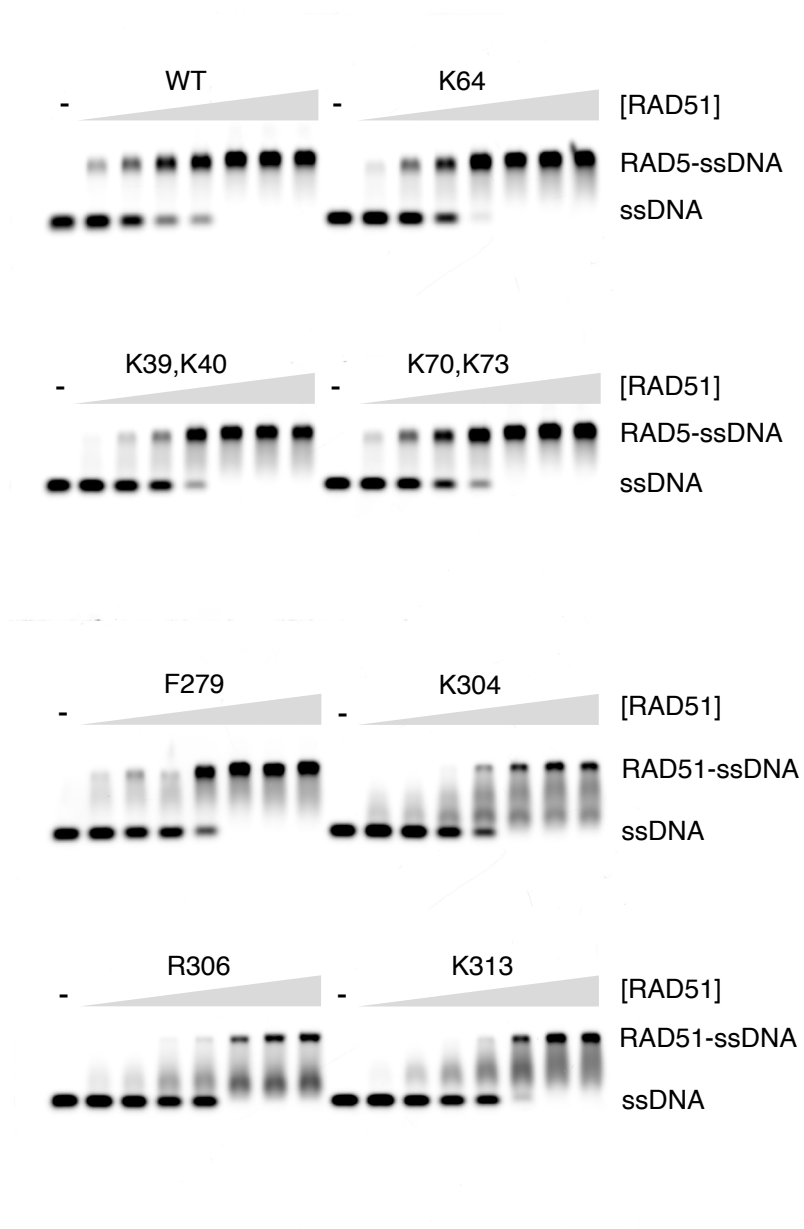

Supplement: fig5-figsupp1-data2 [file elife-107114-fig5-figsupp1-data2-v1.zip]

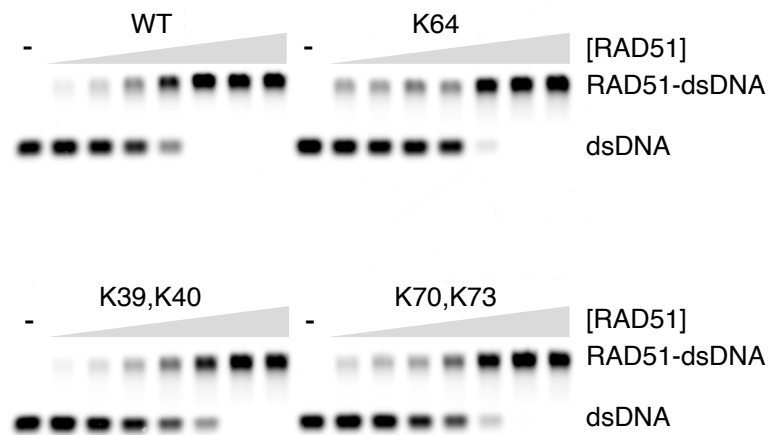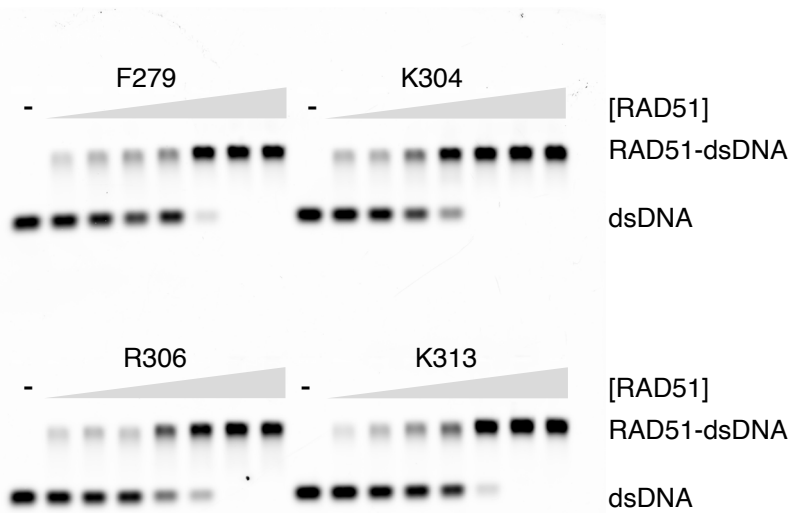

Supplement: fig5-figsupp1-data2 [file elife-107114-fig5-figsupp1-data2-v1.zip]

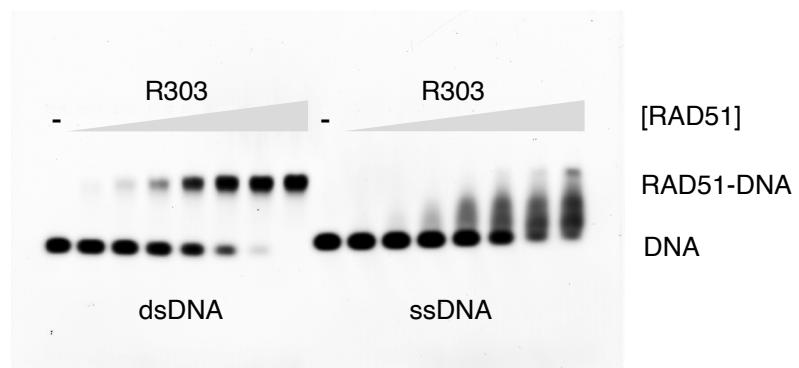

Supplement: fig5-figsupp1-data2 [file elife-107114-fig5-figsupp1-data2-v1.zip]
